# Supplementary material
Source: publisher site journal article supplement (https://www.dovepress.com/get_supplementary_file.php?f=312162.docx)
Supplement: Supplementary file 1 [file get_supplementary_file.php]

**(Supplementary )**

**Brachytherapy biliary drainage catheter** **placement**.

The biliary stenosis was dilated using a 6 or 7 mm balloon catheter (Boston Scientific, USA). Then, a SEMS stent (diameter =10 mm, length = 50 or 60 mm; Niti-S Biliary stent, taewoong, Seoul, Korea) was deployed across the biliary stenosis or occlusion. Finally, the stent deployment system was exchanged with the BBDC loaded with 125I seeds, and the device was fixed . Afterwards, the position of the seeds was verified by SPECT/CT within three days. The estimated radiation dose at reference point A (5 mm from the center) was calculated using a computerized treatment planning system (TPS). Cholangiography was performed to verify the position of the drainage catheter and patency of the stent at (1-1.5)month after the procedure. After the patency of the expanded stent was confirmed, the brachytherapy catheter was removed.

**[Iodine-125](https://www.sciencedirect.com/topics/medicine-and-dentistry/iodine-125" \o "Learn more about Iodine 125 from ScienceDirect's AI-generated Topic Pages) (125I) seed strand placement.**

To enable 125I seeds to fit for the lumen shape, we encapsulated 125I seeds into a 4F catheter to form a 125I seed stand. The number of 125I seeds to be implanted was calculated using the following formula: N=L/4.5+ 4. A 5F long sheath and a stent were separately introduced into the bile duct using two parallel stiff guide wires. After stent installation, the premade125I seed strand was implanted through the 5F long sheath. Cholangiography was performed to verify the position of the 125I seed strand and patency of the stent at 1-1.5 months after the procedure. After the patency of the stent was confirmed, the 125I seed strand was removed.
